# Supplementary material for: Conformational and vibrational study of cis-diamminedichloropalladium(ii)
Source: Royal Society of Chemistry journal article supplement (doi:10.1039/c0cp00957a), 2010-01-01

**Table S1** Total r.m.s. values for cDDPd vibrational modes *without using scaling factors* ( $\lambda = 1$ ) for the different basis sets at the non-metal atoms and LANL2DZ at the Pd-atom. The *FineGrid* option was used in the case of the DFT. The lowest r.m.s. values for each theory level are shaded.

| Theory Level                 | HF                    | MP2                   | B3LYP                 | mPW1PW                |
|------------------------------|-----------------------|-----------------------|-----------------------|-----------------------|
|                              | r.m.s. <sup>(b)</sup> | r.m.s. <sup>(b)</sup> | r.m.s. <sup>(b)</sup> | r.m.s. <sup>(b)</sup> |
| 6-31G                        | 9,8%                  | 7,1%                  | 5,5%                  | 5,5%                  |
| 6-31+G                       | 9,9%                  | 7,1%                  | 5,9%                  | 5,7%                  |
| 6-31++G                      | 9,8%                  | 7,0%                  | 7,9%                  | 5,6%                  |
| 6-31G*                       | 10,4%                 | 8,1%                  | 7,1%                  | 6,8%                  |
| 6-31G**                      | 9,9%                  | 8,4%                  | 7,4%                  | 6,9%                  |
| 6-31+G*                      | 10,7%                 | 8,1%                  | 7,7%                  | 7,2%                  |
| 6-31++G*                     | 10,7%                 | 8,0%                  | 7,6%                  | 7,1%                  |
| 6-31+G**                     | 10,2%                 | 8,2%                  | 7,7%                  | 7,3%                  |
| 6-31++G**                    | 10,2%                 | 8,1%                  | 8,9%                  | 7,3%                  |
| 6-31+G(2df)                  | 10,1%                 | 6,0%                  | 7,9%                  | 7,6%                  |
| 6-31+G(2df,p)                | 10,0%                 | 6,6%                  | 8,1%                  | 7,5%                  |
| 6-31+G(2df,2p)               | 10,1%                 | 6,9%                  | 8,1%                  | 7,8%                  |
| 6-31+G(2df,2pd)              | 10,1%                 | 6,7%                  | 8,1%                  | 7,5%                  |
| cc-pVDZ                      |                       | 8,5%                  | 8,0%                  | 7,3%                  |
| AUG-cc-pVDZ                  |                       | 6,4%                  | 8,0%                  | 6,8%                  |
| 6-311G                       | 10,3%                 | 7,1%                  | 5,8%                  | 5,6%                  |
| 6-311+G                      | 9,9%                  | 6,6%                  | 6,1%                  | 5,8%                  |
| 6-311++G                     | 9,8%                  | 6,5%                  | 6,1%                  | 5,8%                  |
| 6-311G*                      | 10,7%                 | 8,8%                  | 7,6%                  | 7,2%                  |
| 6-311G**                     | 10,1%                 | 8,7%                  | 8,1%                  | 7,4%                  |
| 6-311+G*                     | 10,8%                 | 8,2%                  | 7,7%                  | 7,3%                  |
| 6-311++G*                    | 10,9%                 | 8,0%                  | 7,8%                  | 7,3%                  |
| 6-311+G**                    | 10,2%                 | 7,8%                  | 8,3%                  | 7,5%                  |
| 6-311++G**                   | 10,2%                 | 7,7%                  | 8,2%                  | 7,5%                  |
| 6-311+G(2df)                 | 10,4%                 | 6,7%                  | 8,4%                  | 7,8%                  |
| 6-311+G(2df,p)               | 10,2%                 | 7,0%                  | 8,3%                  | 7,7%                  |
| 6-311+G(2df,2p)              | 10,4%                 | 7,4%                  | 9,9%                  | 7,8%                  |
| 6-311+G(2df,2pd)             | 11,1%                 | 7,6%                  | 8,3%                  | 7,8%                  |
| 6-311+G(3df,3pd)             | 9,8%                  | 7,8%                  | 7,7%                  | 7,4%                  |
| cc-pVTZ                      |                       | 8,5%                  | 8,3%                  | 7,8%                  |
| AUG-cc-pVTZ                  |                       | 6,4%                  | 7,9%                  | 7,7%                  |
| <b>MP2(full)/AUG-cc-pVTZ</b> |                       | 7,0%                  |                       |                       |

$$^{(a)}\text{r.m.s.} = \left( \frac{\sum_{i=1}^n \Delta_i}{n} \right)^{1/2}$$

**Table S2** *One average scaling factor* for all cDDPd's vibrational modes and r.m.s. values obtained using the different basis sets at the non-metal atoms and LANL2DZ at the Pd-atom. The *FineGrid* option was used in the case of the DFT. The lowest r.m.s. values for each theory level are shaded.

| Theory Level          | HF              |                       | MP2             |                       | B3LYP           |                       | mPW1PW          |                       |
|-----------------------|-----------------|-----------------------|-----------------|-----------------------|-----------------|-----------------------|-----------------|-----------------------|
|                       | $\lambda^{(a)}$ | r.m.s. <sup>(b)</sup> |
| 6-31G                 | 0,90            | 7,3%                  | 0,93            | 6,4%                  | 0,96            | 5,9%                  | 0,93            | 5,3%                  |
| 6-31+G                | 0,91            | 7,9%                  | 0,94            | 6,3%                  | 0,96            | 6,5%                  | 0,94            | 5,4%                  |
| 6-31++G               | 0,91            | 7,7%                  | 0,94            | 6,2%                  | 1,00            | 7,9%                  | 0,94            | 5,4%                  |
| 6-31G*                | 0,93            | 9,1%                  | 0,95            | 7,4%                  | 0,98            | 7,1%                  | 0,95            | 6,5%                  |
| 6-31G**               | 0,94            | 8,8%                  | 0,96            | 8,2%                  | 0,99            | 7,5%                  | 0,96            | 7,0%                  |
| 6-31+G*               | 0,93            | 9,6%                  | 0,95            | 7,3%                  | 0,98            | 7,6%                  | 0,96            | 7,0%                  |
| 6-31++G*              | 0,93            | 9,5%                  | 0,95            | 7,1%                  | 0,98            | 7,6%                  | 0,96            | 6,9%                  |
| 6-31+G**              | 0,95            | 9,2%                  | 0,96            | 8,1%                  | 0,99            | 7,6%                  | 0,97            | 7,3%                  |
| 6-31++G**             | 0,95            | 9,2%                  | 0,96            | 7,9%                  | 1,01            | 8,9%                  | 0,97            | 7,3%                  |
| 6-31+G(2df)           | 0,95            | 9,0%                  | 0,95            | 6,5%                  | 1,00            | 7,9%                  | 0,97            | 7,4%                  |
| 6-31+G(2df,p)         | 0,95            | 8,9%                  | 0,95            | 6,9%                  | 1,00            | 8,1%                  | 0,98            | 7,5%                  |
| 6-31+G(2df,2p)        | 0,95            | 9,1%                  | 0,95            | 7,4%                  | 1,00            | 8,1%                  | 0,98            | 7,7%                  |
| 6-31+G(2df,2pd)       | 0,95            | 9,0%                  | 0,95            | 7,5%                  | 1,00            | 8,1%                  | 0,98            | 7,5%                  |
| cc-pVDZ               |                 |                       | 0,98            | 8,5%                  | 1,00            | 8,0%                  | 0,98            | 7,5%                  |
| AUG-cc-pVDZ           |                 |                       | 0,95            | 7,7%                  | 1,01            | 8,0%                  | 0,97            | 7,5%                  |
| 6-311G                | 0,95            | 9,3%                  | 0,94            | 6,4%                  | 0,96            | 6,5%                  | 0,94            | 5,5%                  |
| 6-311+G               | 0,91            | 7,9%                  | 0,93            | 5,9%                  | 0,97            | 6,7%                  | 0,94            | 5,6%                  |
| 6-311++G              | 0,91            | 7,6%                  | 0,93            | 5,9%                  | 0,97            | 6,6%                  | 0,94            | 5,6%                  |
| 6-311G*               | 0,93            | 9,6%                  | 0,95            | 8,1%                  | 0,98            | 7,6%                  | 0,95            | 6,9%                  |
| 6-311G**              | 0,95            | 9,2%                  | 0,98            | 8,9%                  | 1,00            | 8,1%                  | 0,98            | 7,4%                  |
| 6-311+G*              | 0,93            | 9,6%                  | 0,94            | 7,3%                  | 0,98            | 7,7%                  | 0,95            | 7,1%                  |
| 6-311++G*             | 0,93            | 9,6%                  | 0,94            | 7,2%                  | 0,98            | 7,8%                  | 0,95            | 7,1%                  |
| 6-311+G**             | 0,95            | 9,2%                  | 0,97            | 8,3%                  | 1,00            | 8,3%                  | 0,98            | 7,5%                  |
| 6-311++G**            | 0,95            | 9,2%                  | 0,97            | 8,4%                  | 1,00            | 8,2%                  | 0,98            | 7,5%                  |
| 6-311+G(2df)          | 0,95            | 9,4%                  | 0,95            | 6,8%                  | 1,00            | 8,4%                  | 0,98            | 7,7%                  |
| 6-311+G(2df,p)        | 0,95            | 9,3%                  | 0,96            | 7,2%                  | 1,00            | 8,3%                  | 0,98            | 7,7%                  |
| 6-311+G(2df,2p)       | 0,95            | 9,1%                  | 0,96            | 7,6%                  | 1,04            | 9,2%                  | 0,98            | 7,7%                  |
| 6-311+G(2df,2pd)      | 0,94            | 9,4%                  | 0,96            | 8,0%                  | 1,00            | 8,3%                  | 0,98            | 7,7%                  |
| 6-311+G(3df,3pd)      | 0,94            | 8,4%                  | 0,96            | 8,6%                  | 1,00            | 7,7%                  | 0,97            | 7,5%                  |
| cc-pVTZ               |                 |                       | 0,98            | 8,5%                  | 1,00            | 8,3%                  | 0,98            | 7,7%                  |
| AUG-cc-pVTZ           |                 |                       | 0,95            | 7,7%                  | 0,99            | 7,8%                  | 0,97            | 7,7%                  |
| MP2(full)/AUG-cc-pVTZ |                 |                       | 0,93            | 7,5%                  |                 |                       |                 |                       |

$$^{(a)} \lambda = \left( \frac{\sum_{i=1}^n (v_i / \omega_i)}{n} \right)^{1/2} \quad ^{(b)} \text{r.m.s.} = \left( \frac{\sum_{i=1}^n \Delta_i}{n} \right)^{1/2}; \quad \Delta_i = \sqrt{(v_i - \lambda \cdot \omega_i)^2} / v_i^{1/2}$$

**Table S3** *One-factor* scaling (above 400 cm<sup>-1</sup>) for cDDPd vibrational modes and r.m.s. values obtained using the different basis sets at the non-metal atoms and LANL2DZ at the Pd-atom. The *FineGrid* option was used in the case of the DFT. The lowest r.m.s. values for each theory level are shaded.

| Theory Level          | HF              |                       | MP2             |                       | B3LYP           |                       | mPW1PW          |                       |
|-----------------------|-----------------|-----------------------|-----------------|-----------------------|-----------------|-----------------------|-----------------|-----------------------|
|                       | $\lambda^{(a)}$ | r.m.s. <sup>(b)</sup> |
| 6-31G                 | 0,91            | 5,7%                  | 0,97            | 6,3%                  | 0,98            | 5,3%                  | 0,97            | 4,9%                  |
| 6-31+G                | 0,91            | 6,1%                  | 0,97            | 6,4%                  | 0,98            | 5,7%                  | 0,97            | 5,3%                  |
| 6-31++G               | 0,91            | 5,9%                  | 0,97            | 6,3%                  | 0,98            | 7,8%                  | 0,97            | 5,2%                  |
| 6-31G*                | 0,93            | 8,2%                  | 0,99            | 7,8%                  | 1,00            | 7,2%                  | 0,99            | 6,6%                  |
| 6-31G**               | 0,94            | 8,1%                  | 1,00            | 8,4%                  | 1,02            | 7,6%                  | 1,01            | 7,0%                  |
| 6-31+G*               | 0,93            | 8,6%                  | 0,99            | 7,8%                  | 1,01            | 7,8%                  | 0,99            | 7,1%                  |
| 6-31++G*              | 0,93            | 8,5%                  | 0,99            | 7,7%                  | 1,01            | 7,7%                  | 0,99            | 7,0%                  |
| 6-31+G**              | 0,95            | 8,7%                  | 1,00            | 8,2%                  | 1,01            | 9,0%                  | 1,01            | 7,4%                  |
| 6-31++G**             | 0,95            | 8,8%                  | 1,00            | 8,1%                  | 1,02            | 8,1%                  | 1,01            | 7,3%                  |
| 6-31+G(2df)           | 0,96            | 8,7%                  | 1,00            | 6,0%                  | 1,02            | 8,2%                  | 1,02            | 7,7%                  |
| 6-31+G(2df,p)         | 0,96            | 8,6%                  | 1,00            | 6,5%                  | 1,03            | 8,4%                  | 1,02            | 7,7%                  |
| 6-31+G(2df,2p)        | 0,96            | 8,8%                  | 1,01            | 7,1%                  | 1,03            | 8,4%                  | 1,02            | 8,1%                  |
| 6-31+G(2df,2pd)       | 0,96            | 8,8%                  | 1,01            | 6,9%                  | 1,04            | 8,3%                  | 1,02            | 7,8%                  |
| cc-pVDZ               |                 |                       | 1,03            | 8,9%                  | 1,03            | 8,4%                  | 1,03            | 7,5%                  |
| AUG-cc-pVDZ           |                 |                       | 1,03            | 6,7%                  | 1,04            | 7,9%                  | 1,03            | 7,1%                  |
| 6-311G                | 0,95            | 8,8%                  | 0,98            | 6,5%                  | 0,98            | 5,6%                  | 0,97            | 5,3%                  |
| 6-311+G               | 0,91            | 6,1%                  | 0,97            | 5,8%                  | 0,99            | 6,0%                  | 0,97            | 5,5%                  |
| 6-311++G              | 0,91            | 6,1%                  | 0,97            | 5,8%                  | 0,99            | 6,0%                  | 0,97            | 5,6%                  |
| 6-311G*               | 0,93            | 8,3%                  | 0,99            | 8,6%                  | 1,00            | 7,6%                  | 0,99            | 6,9%                  |
| 6-311G**              | 0,96            | 8,7%                  | 1,04            | 9,5%                  | 1,03            | 8,4%                  | 1,02            | 7,5%                  |
| 6-311+G*              | 0,93            | 8,5%                  | 0,97            | 7,4%                  | 1,00            | 7,8%                  | 0,99            | 7,1%                  |
| 6-311++G*             | 0,93            | 8,5%                  | 0,98            | 7,4%                  | 1,00            | 7,9%                  | 0,99            | 7,1%                  |
| 6-311+G**             | 0,95            | 8,7%                  | 1,01            | 8,0%                  | 1,03            | 8,6%                  | 1,02            | 7,6%                  |
| 6-311++G**            | 0,95            | 8,8%                  | 1,02            | 8,0%                  | 1,03            | 8,5%                  | 1,02            | 7,7%                  |
| 6-311+G(2df)          | 0,96            | 9,0%                  | 0,99            | 6,5%                  | 1,03            | 8,7%                  | 1,03            | 8,1%                  |
| 6-311+G(2df,p)        | 0,96            | 9,0%                  | 1,01            | 7,0%                  | 1,03            | 8,6%                  | 1,02            | 8,0%                  |
| 6-311+G(2df,2p)       | 0,96            | 9,0%                  | 1,01            | 7,5%                  | 1,09            | 9,8%                  | 1,02            | 8,1%                  |
| 6-311+G(2df,2pd)      | 0,96            | 9,8%                  | 1,03            | 7,8%                  | 1,04            | 8,7%                  | 1,03            | 8,1%                  |
| 6-311+G(3df,3pd)      | 0,96            | 8,7%                  | 1,05            | 8,3%                  | 1,04            | 8,0%                  | 1,03            | 7,6%                  |
| cc-pVTZ               |                 |                       | 1,03            | 8,9%                  | 1,04            | 8,7%                  | 1,03            | 8,1%                  |
| AUG-cc-pVTZ           |                 |                       | 1,03            | 6,7%                  | 1,03            | 8,2%                  | 1,02            | 7,9%                  |
| MP2(full)/AUG-cc-pVTZ |                 |                       | 1,01            | 7,5%                  |                 |                       |                 |                       |

$$^{(a)} \lambda = \left( \frac{\sum_{i=1}^n (v_i / \omega_i)}{n} \right)^{1/2} \quad ^{(b)} \text{r.m.s.} = \left( \frac{\sum_{i=1}^n \Delta_i}{n} \right)^{1/2}; \quad \Delta_i = \sqrt{(v_i - \lambda \cdot \omega_i)^2} / v_i^{1/2}$$

**Table S4** *Two-factor* scaling for cDDPd vibrational modes (above ( $\lambda_1$ ) and below ( $\lambda_2$ ) 400 cm<sup>-1</sup>) and r.m.s. values obtained using the different basis sets at the non-metal atoms and LANL2DZ at the Pd-atom. The *FineGrid* option was used in the case of the DFT. The lowest r.m.s. values for each theory level are shaded.

| Nível de teoria       | HF                |                   |                       | MP2               |                   |                       | B3LYP           |                   |                       | mPW1PW          |                   |                       |
|-----------------------|-------------------|-------------------|-----------------------|-------------------|-------------------|-----------------------|-----------------|-------------------|-----------------------|-----------------|-------------------|-----------------------|
|                       | $\lambda_1^{(a)}$ | $\lambda_2^{(a)}$ | r.m.s. <sup>(b)</sup> | $\lambda_1^{(a)}$ | $\lambda_2^{(a)}$ | r.m.s. <sup>(b)</sup> | $\lambda^{(a)}$ | $\lambda_2^{(a)}$ | r.m.s. <sup>(b)</sup> | $\lambda^{(a)}$ | $\lambda_2^{(a)}$ | r.m.s. <sup>(b)</sup> |
| 6-31G                 | 0,91              | 1,04              | <b>5,8%</b>           | 0,97              | 1,02              | <b>6,3%</b>           | 0,98            | 1,06              | <b>5,2%</b>           | 0,97            | 1,01              | <b>4,9%</b>           |
| 6-31+G                | 0,91              | 1,06              | <b>6,2%</b>           | 0,97              | 1,02              | <b>6,3%</b>           | 0,98            | 1,08              | <b>5,6%</b>           | 0,97            | 1,02              | <b>5,2%</b>           |
| 6-31++G               | 0,91              | 1,05              | <b>6,1%</b>           | 0,97              | 1,02              | <b>6,2%</b>           | 0,98            | 1,18              | <b>7,6%</b>           | 0,97            | 1,02              | <b>5,2%</b>           |
| 6-31G*                | 0,93              | 1,07              | <b>8,5%</b>           | 0,99              | 1,03              | <b>8,0%</b>           | 1,00            | 1,09              | <b>7,1%</b>           | 0,99            | 1,04              | <b>6,7%</b>           |
| 6-31G**               | 0,94              | 1,08              | <b>8,5%</b>           | 1,00              | 1,04              | <b>8,7%</b>           | 1,02            | 1,09              | <b>7,3%</b>           | 1,01            | 1,05              | <b>7,0%</b>           |
| 6-31+G*               | 0,93              | 1,08              | <b>9,0%</b>           | 0,99              | 1,03              | <b>7,8%</b>           | 1,01            | 1,10              | <b>7,5%</b>           | 0,99            | 1,05              | <b>7,1%</b>           |
| 6-31++G*              | 0,93              | 1,08              | <b>8,9%</b>           | 0,99              | 1,03              | <b>7,7%</b>           | 1,01            | 1,09              | <b>7,4%</b>           | 0,99            | 1,05              | <b>7,1%</b>           |
| 6-31+G**              | 0,95              | 1,09              | <b>9,3%</b>           | 1,00              | 1,04              | <b>8,2%</b>           | 1,01            | 1,10              | <b>8,5%</b>           | 1,01            | 1,06              | <b>7,4%</b>           |
| 6-31++G**             | 0,95              | 1,09              | <b>9,3%</b>           | 1,00              | 1,04              | <b>8,1%</b>           | 1,02            | 1,15              | <b>8,1%</b>           | 1,01            | 1,06              | <b>7,4%</b>           |
| 6-31+G(2df)           | 0,96              | 1,09              | <b>9,3%</b>           | 1,00              | 1,01              | <b>6,0%</b>           | 1,02            | 1,11              | <b>8,1%</b>           | 1,02            | 1,05              | <b>7,8%</b>           |
| 6-31+G(2df,p)         | 0,96              | 1,09              | <b>9,0%</b>           | 1,00              | 1,02              | <b>6,5%</b>           | 1,03            | 1,11              | <b>8,3%</b>           | 1,02            | 1,05              | <b>7,8%</b>           |
| 6-31+G(2df,2p)        | 0,96              | 1,09              | <b>9,4%</b>           | 1,01              | 1,01              | <b>7,0%</b>           | 1,03            | 1,11              | <b>8,3%</b>           | 1,02            | 1,05              | <b>8,2%</b>           |
| 6-31+G(2df,2pd)       | 0,96              | 1,09              | <b>9,3%</b>           | 1,01              | 0,99              | <b>7,0%</b>           | 1,04            | 1,11              | <b>8,2%</b>           | 1,02            | 1,05              | <b>7,8%</b>           |
| cc-pVDZ               |                   |                   |                       | 1,03              | 1,06              | <b>9,1%</b>           | 1,03            | 1,10              | <b>8,1%</b>           | 1,03            | 1,06              | <b>7,5%</b>           |
| AUG-cc-pVDZ           |                   |                   |                       | 1,03              | 0,98              | <b>6,8%</b>           | 1,04            | 1,11              | <b>7,8%</b>           | 1,03            | 1,03              | <b>7,1%</b>           |
| 6-311G                | 0,95              | 1,09              | <b>9,3%</b>           | 0,98              | 1,03              | <b>6,7%</b>           | 0,98            | 1,07              | <b>5,5%</b>           | 0,97            | 1,02              | <b>5,2%</b>           |
| 6-311+G               | 0,91              | 1,06              | <b>6,2%</b>           | 0,97              | 1,02              | <b>5,7%</b>           | 0,99            | 1,08              | <b>5,9%</b>           | 0,97            | 1,03              | <b>5,5%</b>           |
| 6-311++G              | 0,91              | 1,05              | <b>6,4%</b>           | 0,97              | 1,01              | <b>5,8%</b>           | 0,99            | 1,08              | <b>5,9%</b>           | 0,97            | 1,02              | <b>5,5%</b>           |
| 6-311G*               | 0,93              | 1,08              | <b>8,8%</b>           | 0,99              | 1,05              | <b>8,9%</b>           | 1,00            | 1,10              | <b>7,3%</b>           | 0,99            | 1,05              | <b>7,0%</b>           |
| 6-311G**              | 0,96              | 1,09              | <b>9,2%</b>           | 1,04              | 1,06              | <b>9,7%</b>           | 1,03            | 1,11              | <b>8,0%</b>           | 1,02            | 1,06              | <b>7,6%</b>           |
| 6-311+G*              | 0,93              | 1,08              | <b>9,0%</b>           | 0,97              | 1,03              | <b>7,3%</b>           | 1,00            | 1,10              | <b>7,5%</b>           | 0,99            | 1,05              | <b>7,2%</b>           |
| 6-311++G*             | 0,93              | 1,08              | <b>9,0%</b>           | 0,98              | 1,03              | <b>7,4%</b>           | 1,00            | 1,10              | <b>7,7%</b>           | 0,99            | 1,04              | <b>7,2%</b>           |
| 6-311+G**             | 0,95              | 1,09              | <b>9,3%</b>           | 1,01              | 1,05              | <b>7,8%</b>           | 1,03            | 1,12              | <b>8,1%</b>           | 1,02            | 1,06              | <b>7,7%</b>           |
| 6-311++G**            | 0,95              | 1,09              | <b>9,3%</b>           | 1,02              | 1,04              | <b>7,9%</b>           | 1,03            | 1,12              | <b>8,1%</b>           | 1,02            | 1,06              | <b>7,7%</b>           |
| 6-311+G(2df)          | 0,96              | 1,10              | <b>9,6%</b>           | 0,99              | 1,03              | <b>6,5%</b>           | 1,03            | 1,11              | <b>8,6%</b>           | 1,03            | 1,05              | <b>8,2%</b>           |
| 6-311+G(2df,p)        | 0,96              | 1,10              | <b>9,7%</b>           | 1,01              | 1,03              | <b>7,0%</b>           | 1,03            | 1,11              | <b>8,5%</b>           | 1,02            | 1,06              | <b>8,1%</b>           |
| 6-311+G(2df,2p)       | 0,96              | 1,08              | <b>9,6%</b>           | 1,01              | 1,02              | <b>7,4%</b>           | 1,09            | 1,11              | <b>9,7%</b>           | 1,02            | 1,05              | <b>8,2%</b>           |
| 6-311+G(2df,2pd)      | 0,96              | 1,06              | <b>10,2%</b>          | 1,03              | 1,00              | <b>7,8%</b>           | 1,04            | 1,10              | <b>8,6%</b>           | 1,03            | 1,05              | <b>8,2%</b>           |
| 6-311+G(3df,3pd)      | 0,96              | 1,06              | <b>9,2%</b>           | 1,05              | 0,98              | <b>8,3%</b>           | 1,04            | 1,08              | <b>8,1%</b>           | 1,03            | 1,03              | <b>7,7%</b>           |
| cc-pVTZ               |                   |                   |                       | 1,03              | 1,06              | <b>9,1%</b>           | 1,04            | 1,11              | <b>8,6%</b>           | 1,03            | 1,05              | <b>8,1%</b>           |
| AUG-cc-pVTZ           |                   |                   |                       | 1,03              | 0,98              | <b>6,8%</b>           | 1,03            | 1,09              | <b>8,3%</b>           | 1,02            | 1,03              | <b>7,9%</b>           |
| MP2(full)/AUG-cc-pVTZ |                   |                   |                       | 1,01              | 0,94              | <b>7,5%</b>           |                 |                   |                       |                 |                   |                       |

$$^{(a)} \lambda = \left( \sum_{i=1}^n (v_i / \omega_i) \right) / n \quad ^{(b)} \text{r.m.s.} = \left( \sum_{i=1}^n \Delta_i \right) / n; \quad \Delta_i = \sqrt{(v_i - \lambda \cdot \omega_i)^2} / v_i \cdot ^{12}$$

**Table S5** *Two-factor* scaling for cDDPd vibrational modes ( $\lambda_1$  for all vibrational modes except for vPd-N and  $\delta$ N-Pd-Cl ( $\lambda_2$ ) ones) and r.m.s. values obtained using the different basis sets at the non-metal atoms and LANL2DZ at the Pd-atom. The *FineGrid* option was used in the case of the DFT. The lowest r.m.s. values for each theory level are shaded.

| Nível de teoria       | HF                |                   |                       | MP2               |                   |                       | B3LYP           |                   |                       | mPW1PW          |                   |                       |
|-----------------------|-------------------|-------------------|-----------------------|-------------------|-------------------|-----------------------|-----------------|-------------------|-----------------------|-----------------|-------------------|-----------------------|
|                       | $\lambda_1^{(a)}$ | $\lambda_2^{(a)}$ | r.m.s. <sup>(b)</sup> | $\lambda_1^{(a)}$ | $\lambda_2^{(a)}$ | r.m.s. <sup>(b)</sup> | $\lambda^{(a)}$ | $\lambda_2^{(a)}$ | r.m.s. <sup>(b)</sup> | $\lambda^{(a)}$ | $\lambda_2^{(a)}$ | r.m.s. <sup>(b)</sup> |
| 6-31G                 | 0,92              | 1,14              | <b>6,9%</b>           | 0,96              | 1,12              | <b>7,1%</b>           | 0,98            | 1,14              | <b>5,9%</b>           | 0,96            | 1,08              | <b>5,5%</b>           |
| 6-31+G                | 0,92              | 1,16              | <b>7,5%</b>           | 0,97              | 1,13              | <b>7,1%</b>           | 0,99            | 1,17              | <b>6,5%</b>           | 0,97            | 1,11              | <b>6,0%</b>           |
| 6-31++G               | 0,92              | 1,16              | <b>7,3%</b>           | 0,97              | 1,12              | <b>7,0%</b>           | 1,03            | 1,17              | <b>8,2%</b>           | 0,97            | 1,10              | <b>6,0%</b>           |
| 6-31G*                | 0,95              | 1,13              | <b>9,5%</b>           | 0,98              | 1,16              | <b>8,9%</b>           | 1,00            | 1,19              | <b>7,9%</b>           | 0,98            | 1,14              | <b>7,4%</b>           |
| 6-31G**               | 0,96              | 1,14              | <b>9,5%</b>           | 0,99              | 1,17              | <b>9,7%</b>           | 1,01            | 1,21              | <b>8,2%</b>           | 0,99            | 1,15              | <b>7,8%</b>           |
| 6-31+G*               | 0,94              | 1,22              | <b>10,7%</b>          | 0,98              | 1,16              | <b>8,4%</b>           | 1,01            | 1,22              | <b>8,4%</b>           | 0,99            | 1,16              | <b>7,9%</b>           |
| 6-31++G*              | 0,94              | 1,22              | <b>10,6%</b>          | 0,98              | 1,14              | <b>8,3%</b>           | 1,02            | 1,13              | <b>7,8%</b>           | 0,99            | 1,15              | <b>7,8%</b>           |
| 6-31+G**              | 0,96              | 1,25              | <b>11,0%</b>          | 0,99              | 1,17              | <b>9,1%</b>           | 1,02            | 1,15              | <b>8,6%</b>           | 1,00            | 1,17              | <b>8,3%</b>           |
| 6-31++G**             | 0,96              | 1,24              | <b>11,0%</b>          | 0,99              | 1,16              | <b>8,9%</b>           | 1,04            | 1,24              | <b>9,0%</b>           | 1,00            | 1,17              | <b>8,2%</b>           |
| 6-31+G(2df)           | 0,96              | 1,24              | <b>11,1%</b>          | 0,98              | 1,11              | <b>6,4%</b>           | 1,02            | 1,23              | <b>9,0%</b>           | 1,00            | 1,17              | <b>8,6%</b>           |
| 6-31+G(2df,p)         | 0,96              | 1,23              | <b>10,7%</b>          | 0,98              | 1,12              | <b>7,0%</b>           | 1,02            | 1,24              | <b>9,2%</b>           | 1,01            | 1,17              | <b>8,5%</b>           |
| 6-31+G(2df,2p)        | 0,96              | 1,24              | <b>11,1%</b>          | 0,99              | 1,11              | <b>7,4%</b>           | 1,03            | 1,24              | <b>9,3%</b>           | 1,01            | 1,17              | <b>8,9%</b>           |
| 6-31+G(2df,2pd)       | 0,96              | 1,23              | <b>11,0%</b>          | 0,99              | 1,08              | <b>7,1%</b>           | 1,03            | 1,24              | <b>9,4%</b>           | 1,01            | 1,16              | <b>8,6%</b>           |
| cc-pVDZ               |                   |                   |                       | 1,01              | 1,20              | <b>10,1%</b>          | 1,03            | 1,23              | <b>9,1%</b>           | 1,01            | 1,17              | <b>8,4%</b>           |
| AUG-cc-pVDZ           |                   |                   |                       | 1,00              | 1,06              | <b>7,2%</b>           | 1,03            | 1,23              | <b>9,1%</b>           | 1,01            | 1,13              | <b>7,8%</b>           |
| 6-311G                | 0,96              | 1,24              | <b>11,0%</b>          | 0,97              | 1,14              | <b>7,5%</b>           | 1,00            | 1,09              | <b>5,7%</b>           | 0,97            | 1,10              | <b>6,2%</b>           |
| 6-311+G               | 0,92              | 1,16              | <b>7,5%</b>           | 0,96              | 1,12              | <b>6,3%</b>           | 0,99            | 1,17              | <b>6,8%</b>           | 0,97            | 1,11              | <b>6,3%</b>           |
| 6-311++G              | 0,92              | 1,16              | <b>7,7%</b>           | 0,96              | 1,11              | <b>6,5%</b>           | 0,99            | 1,17              | <b>6,7%</b>           | 0,97            | 1,11              | <b>6,3%</b>           |
| 6-311G*               | 0,94              | 1,21              | <b>10,3%</b>          | 0,98              | 1,18              | <b>9,7%</b>           | 1,01            | 1,14              | <b>7,9%</b>           | 0,98            | 1,14              | <b>7,8%</b>           |
| 6-311G**              | 0,96              | 1,23              | <b>10,6%</b>          | 1,02              | 1,19              | <b>10,5%</b>          | 1,03            | 1,23              | <b>9,0%</b>           | 1,01            | 1,17              | <b>8,6%</b>           |
| 6-311+G*              | 0,94              | 1,22              | <b>10,8%</b>          | 0,97              | 1,15              | <b>7,9%</b>           | 1,00            | 1,21              | <b>8,4%</b>           | 0,98            | 1,15              | <b>7,9%</b>           |
| 6-311++G*             | 0,94              | 1,22              | <b>10,8%</b>          | 0,97              | 1,14              | <b>8,0%</b>           | 1,00            | 1,21              | <b>8,5%</b>           | 0,98            | 1,15              | <b>7,8%</b>           |
| 6-311+G**             | 0,96              | 1,25              | <b>11,0%</b>          | 1,00              | 1,18              | <b>8,8%</b>           | 1,03            | 1,25              | <b>9,1%</b>           | 1,01            | 1,18              | <b>8,5%</b>           |
| 6-311++G**            | 0,96              | 1,24              | <b>11,0%</b>          | 1,00              | 1,17              | <b>8,8%</b>           | 1,03            | 1,24              | <b>9,0%</b>           | 1,01            | 1,17              | <b>8,5%</b>           |
| 6-311+G(2df)          | 0,96              | 1,25              | <b>11,6%</b>          | 0,98              | 1,14              | <b>7,1%</b>           | 1,02            | 1,25              | <b>9,6%</b>           | 1,01            | 1,16              | <b>8,9%</b>           |
| 6-311+G(2df,p)        | 0,96              | 1,26              | <b>11,6%</b>          | 0,99              | 1,15              | <b>7,6%</b>           | 1,03            | 1,25              | <b>9,6%</b>           | 1,01            | 1,18              | <b>8,9%</b>           |
| 6-311+G(2df,2p)       | 0,96              | 1,24              | <b>11,4%</b>          | 0,99              | 1,12              | <b>7,9%</b>           | 1,07            | 1,24              | <b>10,6%</b>          | 1,01            | 1,17              | <b>8,9%</b>           |
| 6-311+G(2df,2pd)      | 0,95              | 1,23              | <b>12,0%</b>          | 1,00              | 1,09              | <b>8,1%</b>           | 1,03            | 1,23              | <b>9,6%</b>           | 1,01            | 1,16              | <b>8,9%</b>           |
| 6-311+G(3df,3pd)      | 0,96              | 1,19              | <b>10,4%</b>          | 1,02              | 1,06              | <b>8,6%</b>           | 1,03            | 1,19              | <b>8,8%</b>           | 1,01            | 1,13              | <b>8,3%</b>           |
| cc-pVTZ               |                   |                   |                       | 1,01              | 1,20              | <b>10,1%</b>          | 1,03            | 1,23              | <b>9,6%</b>           | 1,01            | 1,16              | <b>8,9%</b>           |
| AUG-cc-pVTZ           |                   |                   |                       | 1,00              | 1,06              | <b>7,2%</b>           | 1,02            | 1,21              | <b>9,2%</b>           | 1,00            | 1,14              | <b>8,5%</b>           |
| MP2(full)/AUG-cc-pVTZ |                   |                   |                       | 0,98              | 1,00              | <b>6,1%</b>           |                 |                   |                       |                 |                   |                       |

$$(a) \quad \lambda = \left( \sum_{i=1}^n (v_i / \omega_i) \right) / n. \quad 12 \quad (b) \quad \text{r.m.s.} = \left( \sum_{i=1}^n \Delta_i \right) / n; \quad \Delta_i = \sqrt{(v_i - \lambda \cdot \omega_i)^2} / v_i. \quad 12$$

**Figure S1** Room-temperature FT-IR spectra of solid cDDPd in the 200-4000 and 3000-3600  $\text{cm}^{-1}$  spectral regions. Some regions are expanded in order to allow the visualization of spectral details.

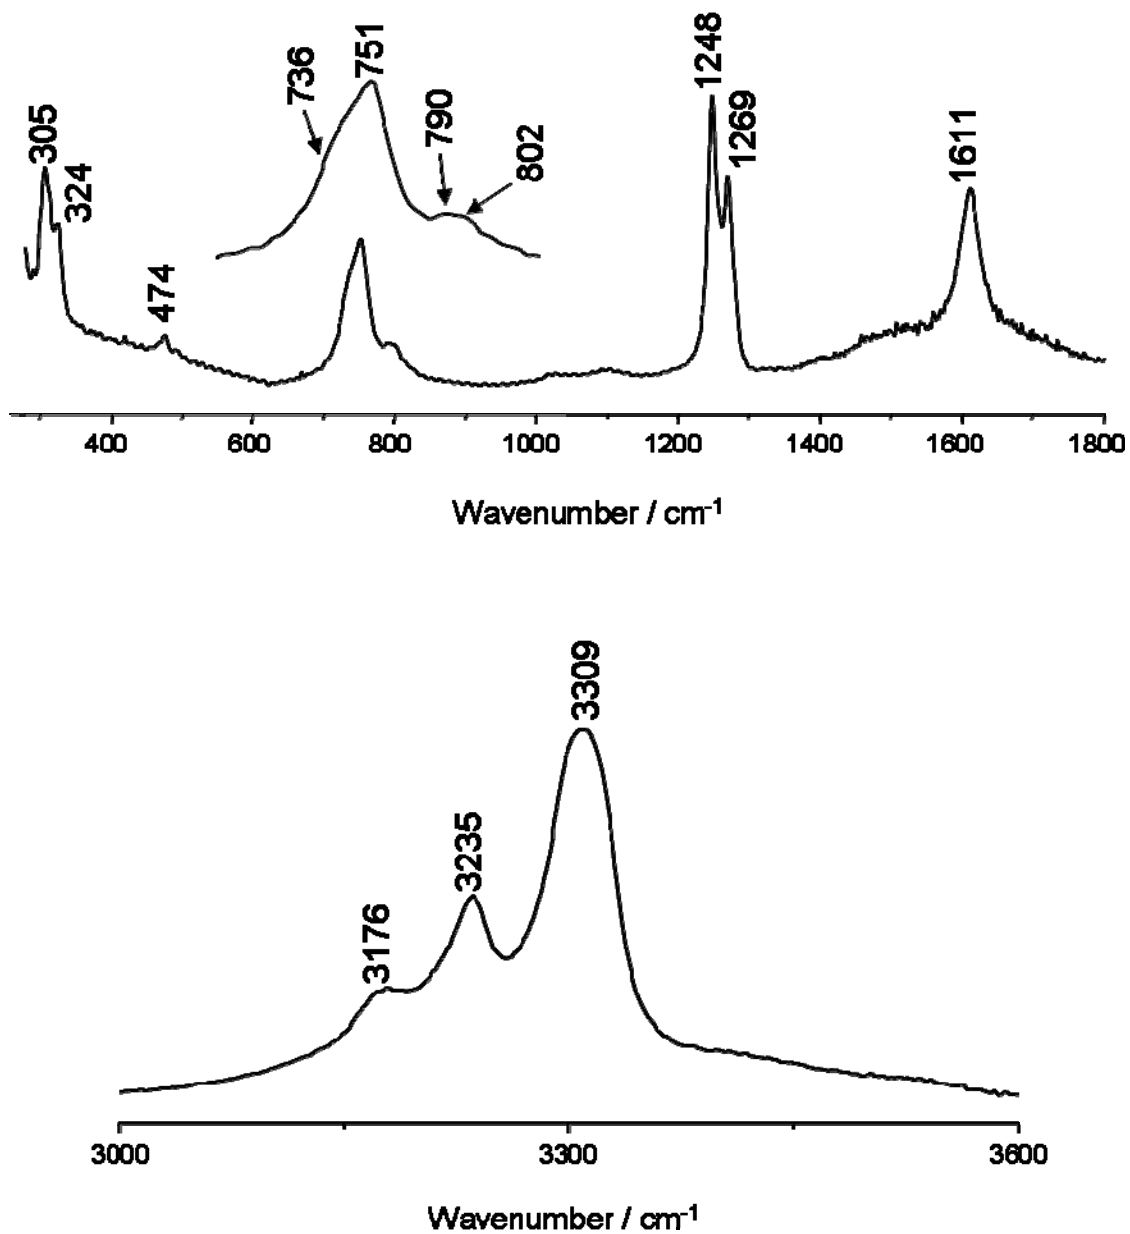

Supplement: c0cp00957a.pdf [file c0cp00957a.pdf]
